# Supplementary material for: A versatile water soluble fluorescent probe for ratiometric sensing of Hg2+ and bovine serum albumin
Source: Royal Society of Chemistry journal article supplement (doi:10.1039/c1dt10362h), 2011-01-01
Supplement: c1dt10362h.pdf [file c1dt10362h.pdf]

**A versatile water soluble fluorescent probe for ratiometric  
sensing of Hg<sup>2+</sup> and bovine serum albumin**

*Jinghan Wen, Zhirong Geng, Yuxin Yin, Zhilin Wang\**

State Key Laboratory of Coordination Chemistry, Coordination Chemistry Institute, School  
of Chemistry and Chemical Engineering, Nanjing University, Nanjing 210093, P. R. China

*\*To whom correspondence should be addressed. E-mail: wangzl@nju.edu.cn.*

## Content

|                                                                                                   | page |
|---------------------------------------------------------------------------------------------------|------|
| 1. $^1\text{H}$ NMR and ESI-MS Spectra of <b>1</b>                                                | S3   |
| 2. $\text{Hg}^{2+}$ Fluorescent Response and Binding Behavior of <b>1</b>                         | S4   |
| 3. Fluorescent Response and Binding Pattern of <b>1</b> with BSA                                  | S10  |
| 4. Computer Program for the Logic Gates Utilizing C Language                                      | S14  |
| 5. Computationally Optimized Energies and Coordinates of <b>1</b> and <b>1</b> - $\text{Hg}^{2+}$ | S15  |

Supporting Information

1. <sup>1</sup>H NMR and ESI-MS Spectra of **1**

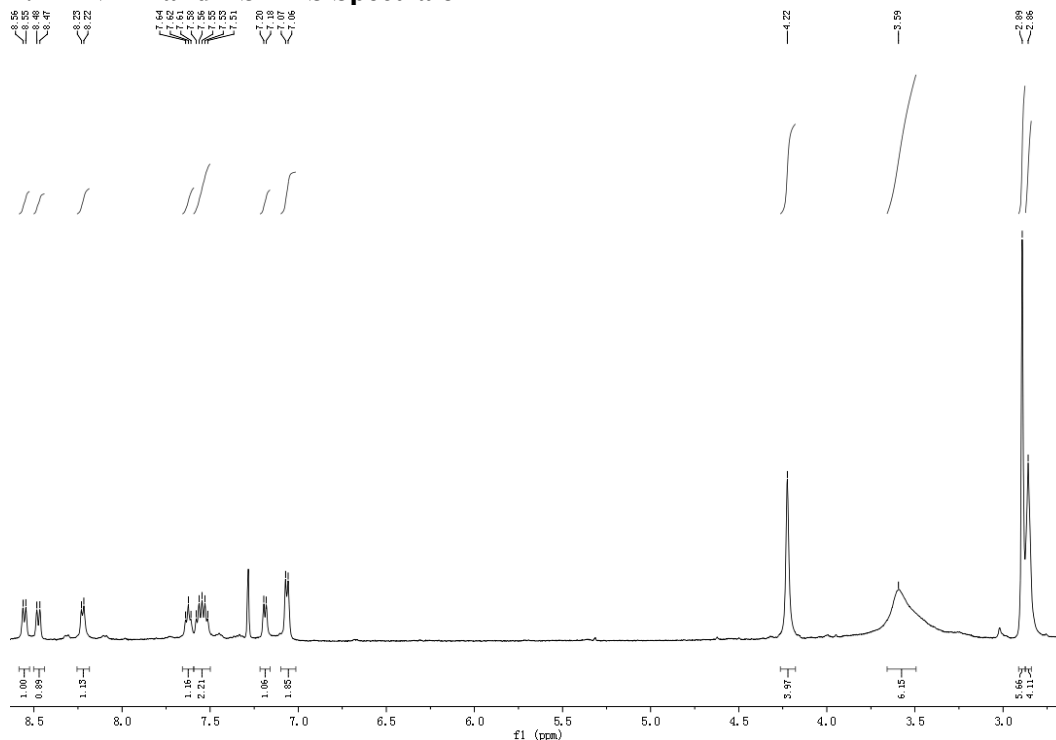

Fig. S1 <sup>1</sup>H NMR spectrum of **1** in CDCl<sub>3</sub> (500 MHz).

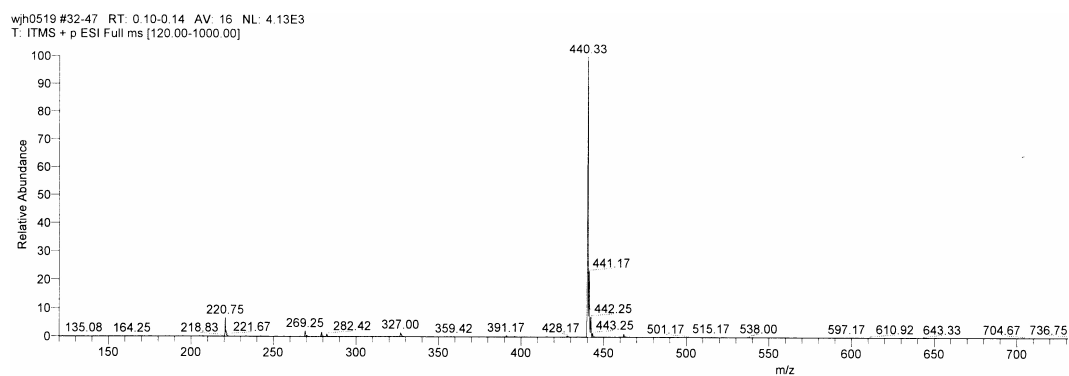

Fig. S2 ESI-MS spectrum of **1** in CH<sub>3</sub>CN.

## 2. Hg<sup>2+</sup> Fluorescent Response and Binding Behavior of **1**

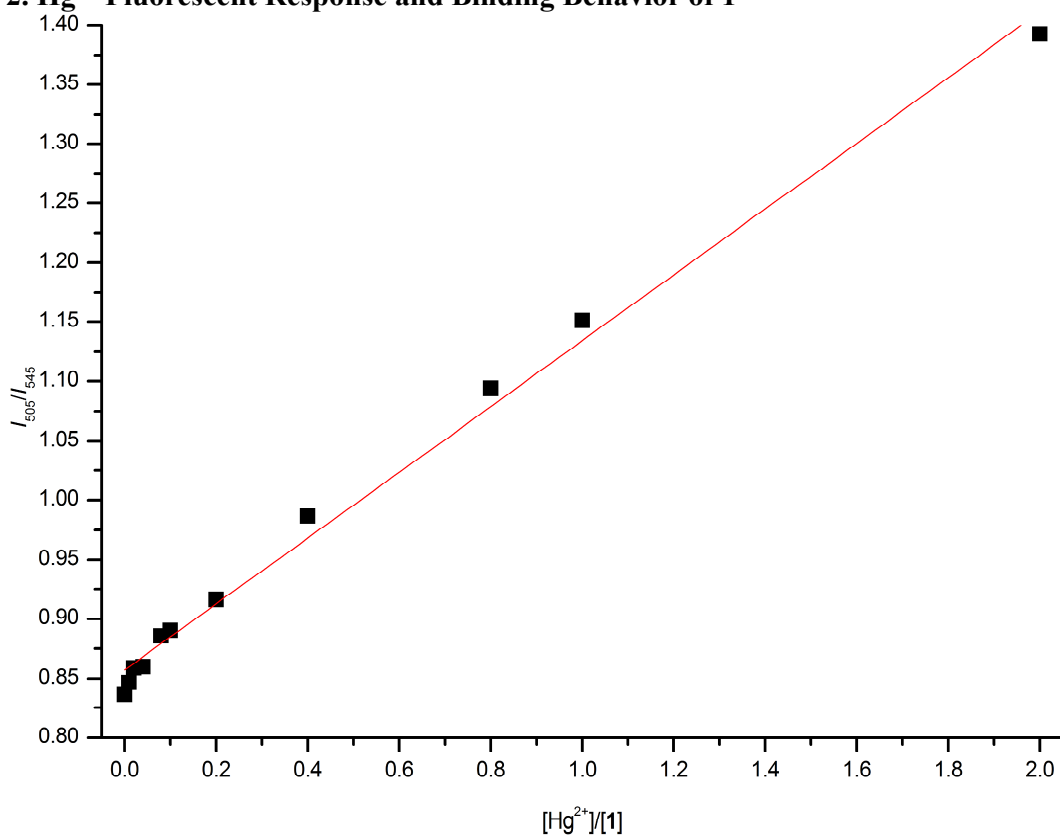

**Fig. S3** The linear increasing range of the emission ratio ( $I_{505}/I_{545}$ ) of 10  $\mu$ M **1** vs. the concentration of Hg<sup>2+</sup> in Tris-HCl buffer (50 mM, pH 7.6).  $\lambda_{ex}=330$  nm.

Supporting Information

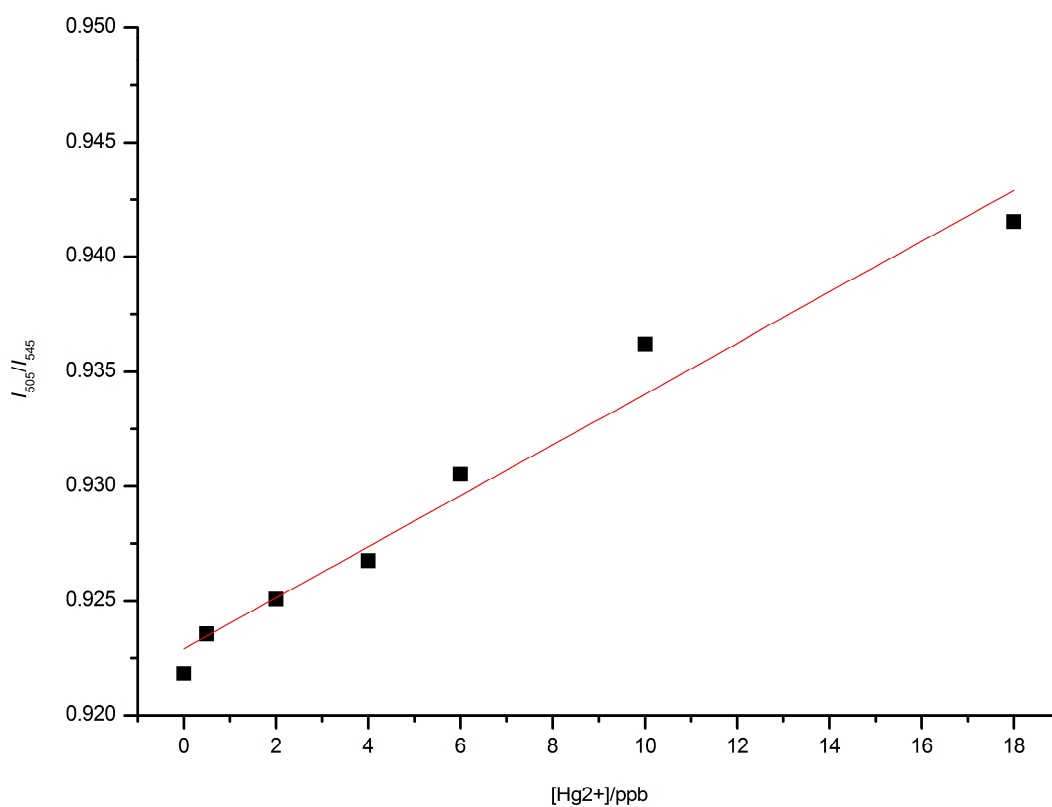

**Fig. S4** The linear increasing of the emission ratio ( $I_{505}/I_{545}$ ) of 5  $\mu\text{M}$  **1** vs. the low concentration range of  $\text{Hg}^{2+}$  in Tris-HCl buffer (50 mM, pH 7.6).  $\lambda_{\text{ex}}=330$  nm.

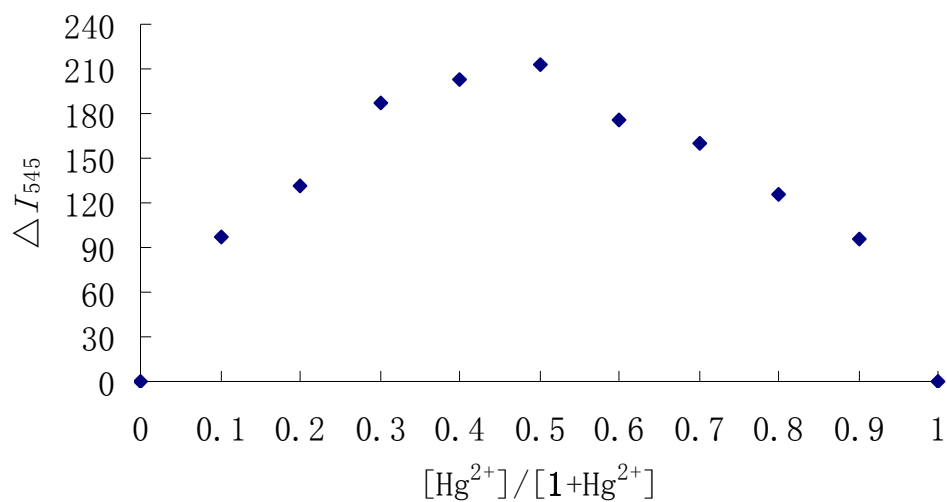

**Fig. S5** Job's plot for the binding between **1** and  $\text{Hg}^{2+}$ .  $[1]+[\text{Hg}^{2+}]=20$   $\mu\text{M}$ .  $\lambda_{\text{ex}}=330$  nm.

Supporting Information

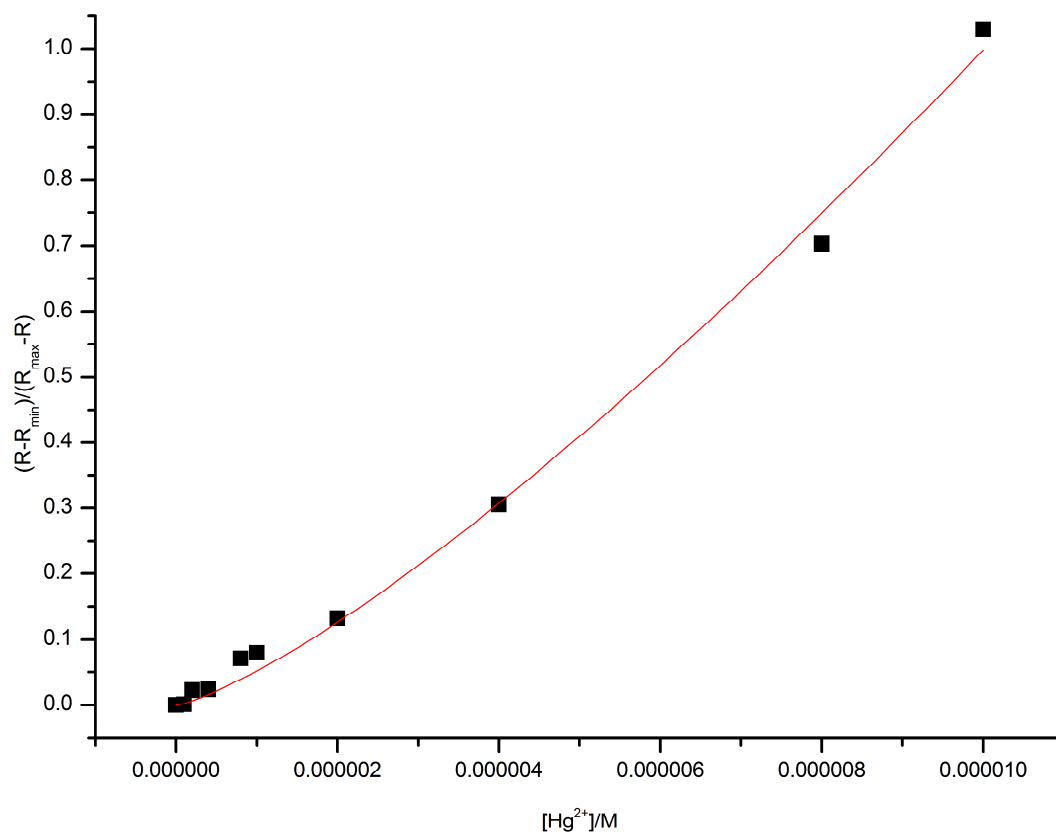

**Fig. S6** The emission change of **1** induced by  $\text{Hg}^{2+}$  titration. The binding constant was obtained by nonlinear fitting to the data, and the red line is the resulted fitting line.

$R=I_{505}/I_{545}$ ,  $\lambda_{\text{ex}}=330$  nm.

Supporting Information

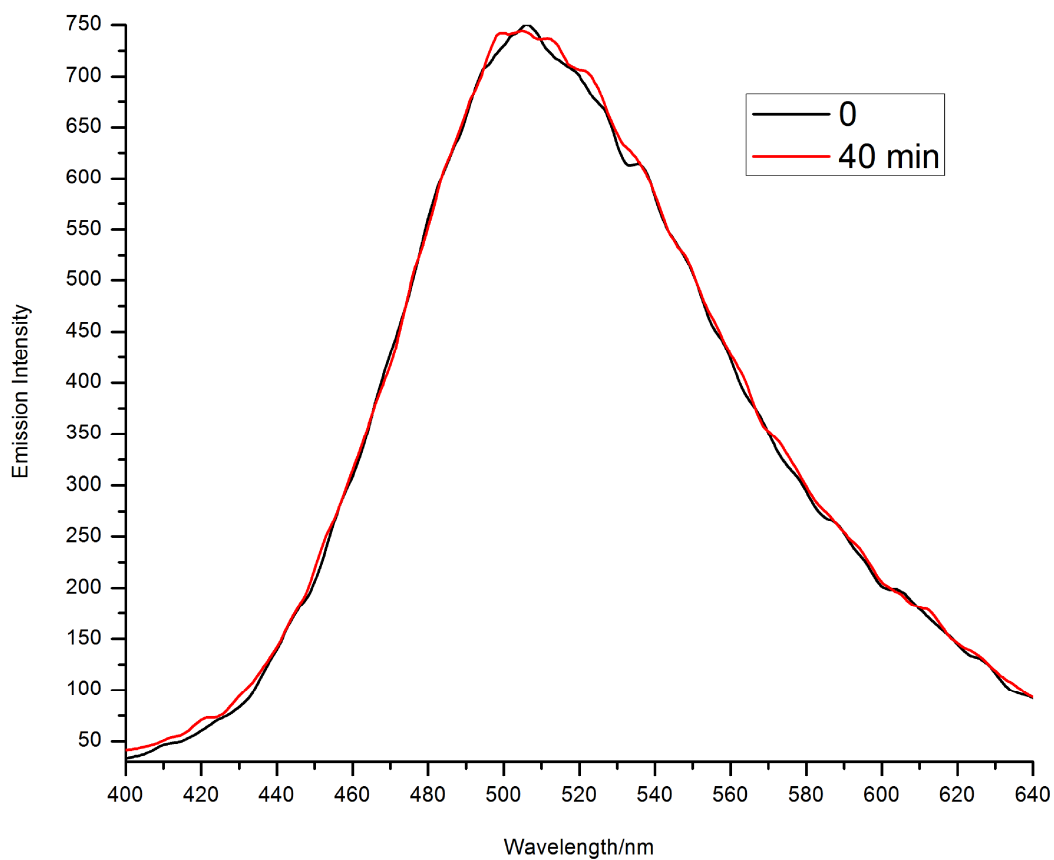

**Fig. S7** Fluorescent spectra of 10  $\mu\text{M}$  **1** in the presence of  $\text{Hg}^{2+}$  (5 equiv.) before and after UV irradiation at 330 nm for 40 min in Tris-HCl buffer (50 mM, pH 7.6).

Supporting Information

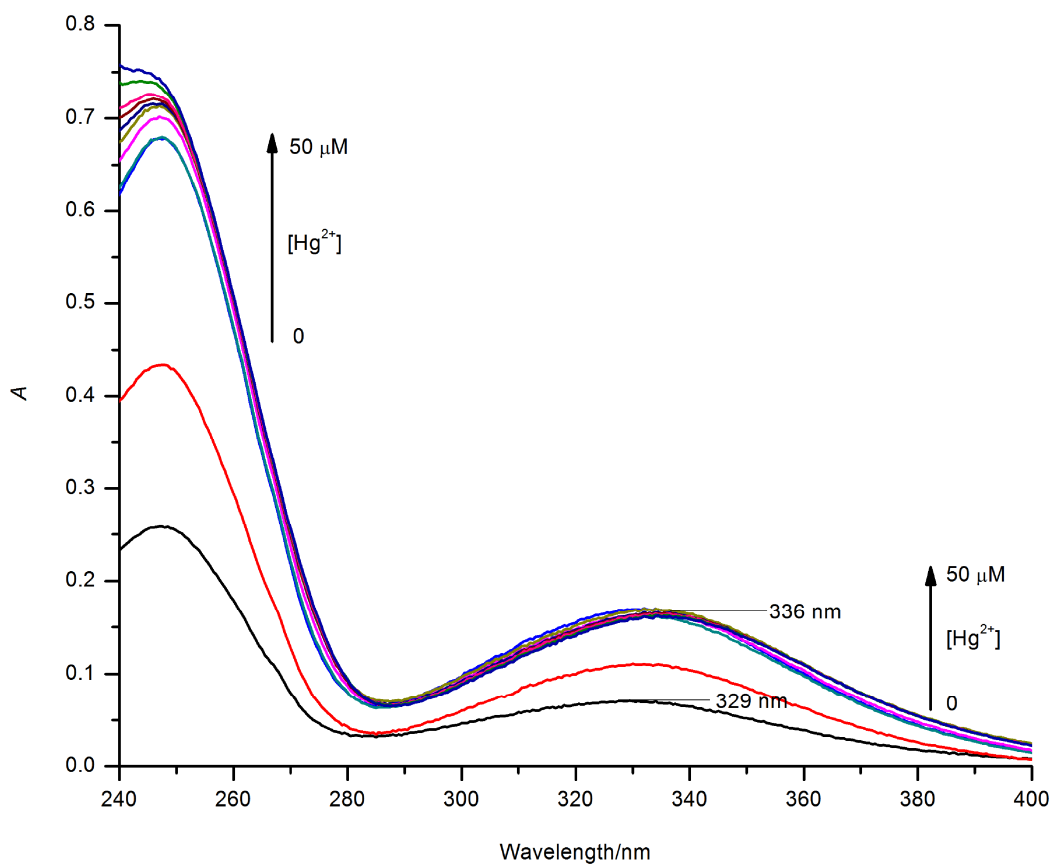

**Fig. S8** UV-vis changes of 50 μM **1** upon addition of Hg<sup>2+</sup> in Tris-HCl buffer (50 mM, pH 7.6).



Supporting Information

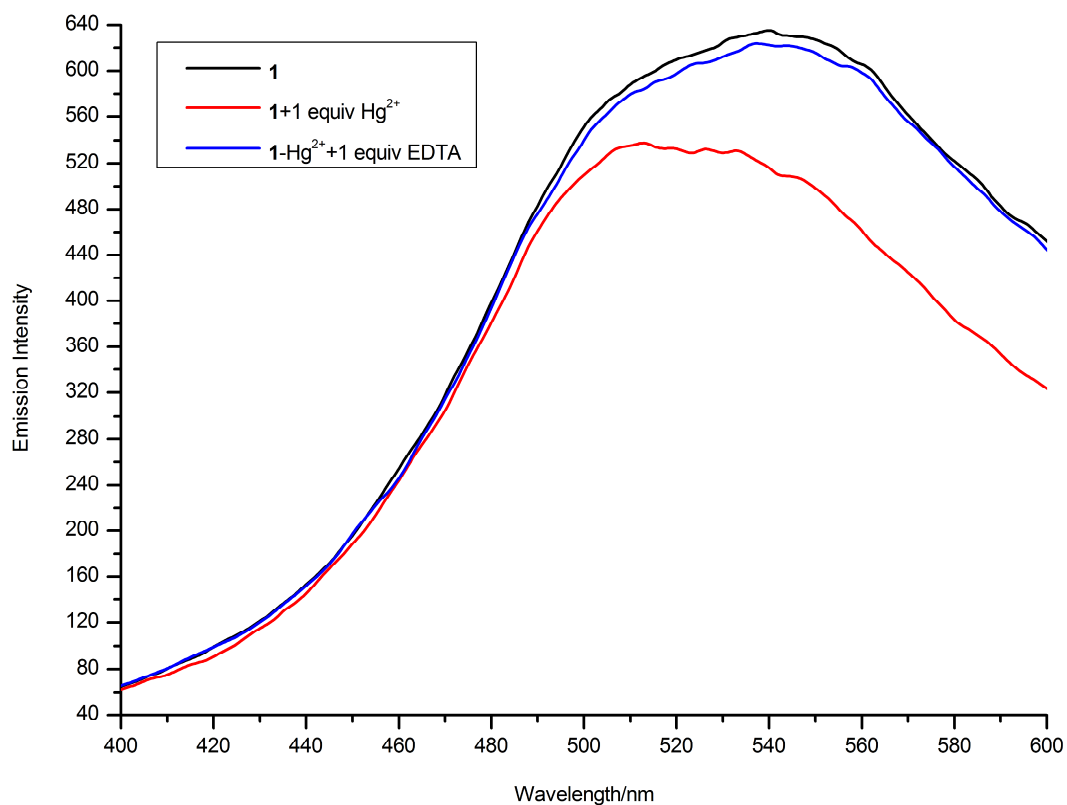

**Fig. S9** Fluorescent changes of 10  $\mu\text{M}$  **1** upon addition of 1 equiv. of  $\text{Hg}^{2+}$  and EDTA in Tris-HCl buffer (50 mM, pH 7.6).  $\lambda_{\text{ex}}=330$  nm.

### 3. Fluorescent Response and Binding Pattern of 1 with BSA

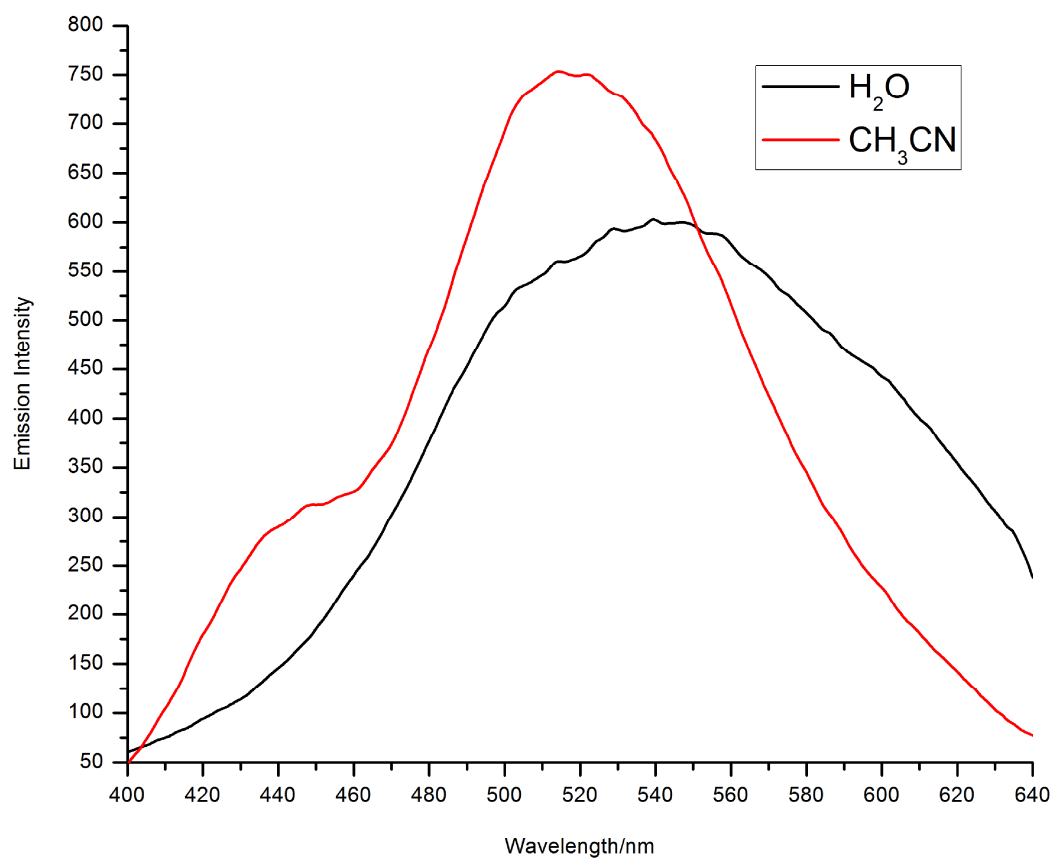

**Fig. S10** Fluorescent spectra of 10  $\mu$ M **1** Tris-HCl aqueous solution (50 mM, pH 7.6) and CH<sub>3</sub>CN.  $\lambda_{\text{ex}}$ =330 nm.

Supporting Information

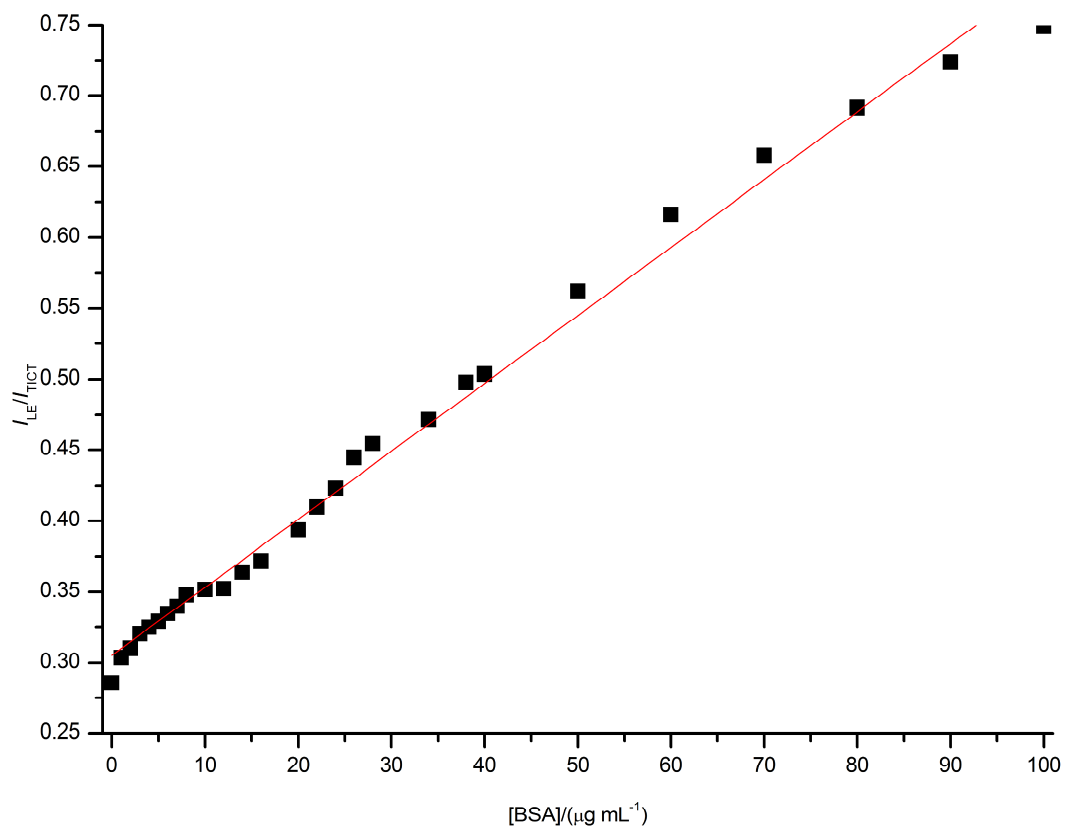

**Fig. S11** The linear increasing range of the emission ratio ( $I_{LE}/I_{TICT}$ ) of 10  $\mu\text{M}$  **1** vs. the concentration of BSA in Tris-HCl buffer (50 mM, pH 7.6).  $\lambda_{\text{ex}}=330$  nm.

Supporting Information

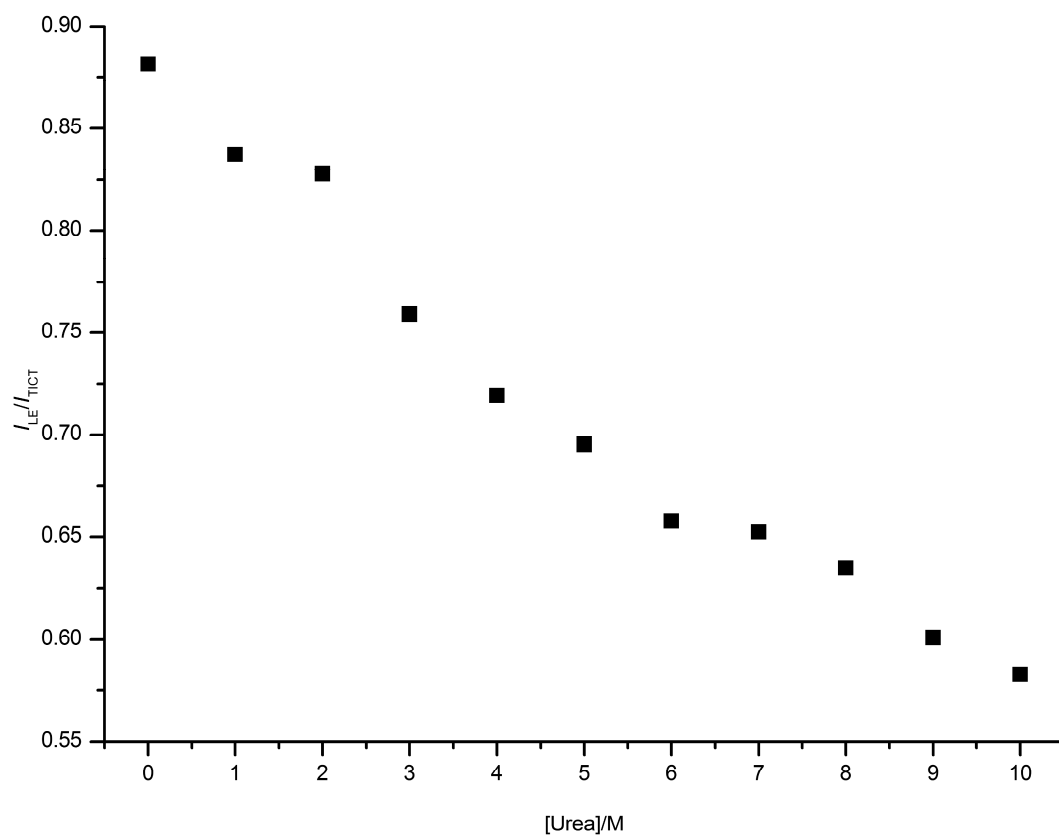

**Fig. S12** The effect of different concentrations of urea on the fluorescent intensity of **1-BSA** in Tris-HCl buffer (50 mM, pH 7.6).  $\lambda_{ex}=330$  nm.

Supporting Information

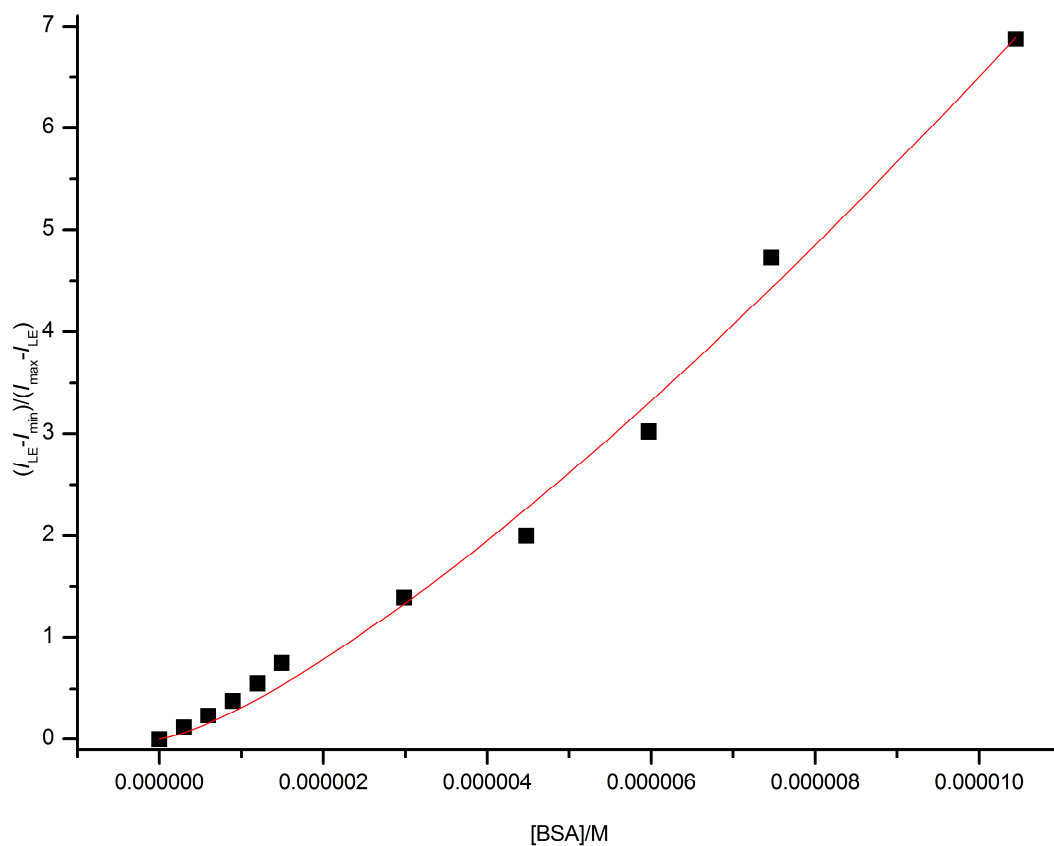

**Fig. S13** The emission change of **1** induced by BSA titration. The binding constant was obtained by nonlinear fitting to the data, and the red line is the resulted fitting line.  $\lambda_{ex}=330$  nm.

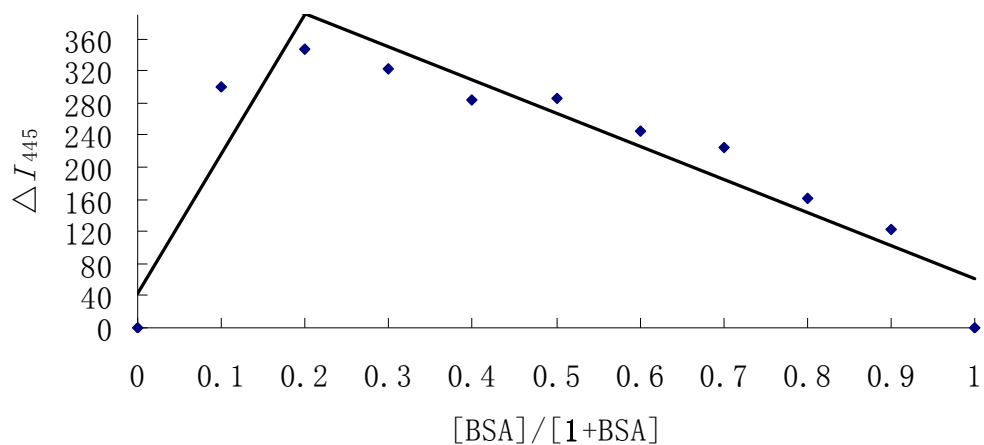

**Fig. S14** Job's plot for the binding between **1** and BSA.  $[1]+[BSA]=20 \mu M$ .  $\lambda_{ex}=330$  nm.

#### 4. Computer Program for the Logic Gates Utilizing C Language

```
void Input_Output(int Input1, int Input2, int &Output_1, int &Output_2, int &Output_3)
{
    if (Input1>1 || Input1 <0 || Input2>1 || Input2<0 )
        printf("%s","Input error");
    else {
        Output_1 = Input2;
        Output_2 = Input1 | Input2;
        Output_3 = (!Input1) & (!Input2);
    }
}
```

## 5. Computationally Optimized Energies and Coordinates of **1** and **1-Hg<sup>2+</sup>**

(1) Energies of optimized compounds (a. u.):

**1**: -1706.9008428

**1-Hg<sup>2+</sup>**: -1749.202072

(2) Coordinates of optimized compounds:

**1**:

Standard orientation:

---

| Center | Atomic | Atomic | Coordinates (Angstroms) |           |           |
|--------|--------|--------|-------------------------|-----------|-----------|
| Number | Number | Type   | X                       | Y         | Z         |
| 1      | 6      | 0      | 4.519706                | 2.356718  | -1.746342 |
| 2      | 6      | 0      | 4.345976                | 1.063757  | -1.244472 |
| 3      | 7      | 0      | 4.064926                | 0.851802  | 0.059037  |
| 4      | 6      | 0      | 3.875293                | 1.893049  | 0.893120  |
| 5      | 6      | 0      | 4.041029                | 3.211142  | 0.457634  |
| 6      | 6      | 0      | 4.380573                | 3.441075  | -0.877335 |
| 7      | 6      | 0      | 4.390483                | -0.183646 | -2.126363 |
| 8      | 6      | 0      | 3.418231                | 1.549419  | 2.308751  |
| 9      | 7      | 0      | 3.096749                | -0.852688 | -2.368263 |
| 10     | 6      | 0      | 2.444677                | -1.601931 | -1.268612 |

---

Supporting Information

---

|    |    |   |           |           |           |
|----|----|---|-----------|-----------|-----------|
| 11 | 6  | 0 | 1.437000  | -0.739881 | -0.457956 |
| 12 | 7  | 0 | 0.789534  | -1.383385 | 0.717845  |
| 13 | 6  | 0 | 1.641083  | -1.843796 | 1.859664  |
| 14 | 6  | 0 | 2.774342  | -0.850318 | 2.183781  |
| 15 | 7  | 0 | 2.320977  | 0.552412  | 2.269635  |
| 16 | 6  | 0 | -2.447478 | -0.549115 | 0.257552  |
| 17 | 6  | 0 | -3.352793 | 0.288422  | -0.479934 |
| 18 | 6  | 0 | -4.135913 | 1.269883  | 0.219821  |
| 19 | 6  | 0 | -3.947424 | 1.428804  | 1.579477  |
| 20 | 6  | 0 | -3.048414 | 0.603002  | 2.294936  |
| 21 | 6  | 0 | -2.328949 | -0.383562 | 1.664826  |
| 22 | 6  | 0 | -1.710075 | -1.499694 | -0.487964 |
| 23 | 6  | 0 | -1.846100 | -1.666836 | -1.839663 |
| 24 | 6  | 0 | -2.711892 | -0.812911 | -2.558832 |
| 25 | 6  | 0 | -3.431169 | 0.153704  | -1.891130 |
| 26 | 16 | 0 | -0.452578 | -2.605808 | 0.306182  |
| 27 | 8  | 0 | 0.008214  | -3.636774 | -0.830244 |
| 28 | 8  | 0 | -0.938055 | -3.189966 | 1.711802  |
| 29 | 7  | 0 | -5.078485 | 2.039374  | -0.534000 |
| 30 | 6  | 0 | -6.337054 | 1.316648  | -0.868022 |
| 31 | 6  | 0 | -5.339533 | 3.412480  | -0.059653 |



Supporting Information

---

|    |   |   |           |           |           |
|----|---|---|-----------|-----------|-----------|
| 32 | 1 | 0 | 4.754889  | 2.507944  | -2.792955 |
| 33 | 1 | 0 | 3.891345  | 4.036069  | 1.143348  |
| 34 | 1 | 0 | 4.514424  | 4.453841  | -1.239740 |
| 35 | 1 | 0 | 4.826054  | 0.077672  | -3.097806 |
| 36 | 1 | 0 | 5.047073  | -0.914621 | -1.643302 |
| 37 | 1 | 0 | 3.042130  | 2.459672  | 2.785377  |
| 38 | 1 | 0 | 4.288232  | 1.200339  | 2.894476  |
| 39 | 1 | 0 | 2.445968  | -0.284947 | -2.914312 |
| 40 | 1 | 0 | 1.912790  | -2.469829 | -1.670942 |
| 41 | 1 | 0 | 3.237589  | -1.965837 | -0.609241 |
| 42 | 1 | 0 | 1.931562  | 0.132066  | -0.036961 |
| 43 | 1 | 0 | 0.632082  | -0.402463 | -1.121805 |
| 44 | 1 | 0 | 2.116030  | -2.816541 | 1.661173  |
| 45 | 1 | 0 | 0.971139  | -1.975638 | 2.711709  |
| 46 | 1 | 0 | 3.258781  | -1.212444 | 3.111917  |
| 47 | 1 | 0 | 3.517207  | -0.866347 | 1.387151  |
| 48 | 1 | 0 | 1.627012  | 0.703081  | 3.004832  |
| 49 | 1 | 0 | -4.524330 | 2.167763  | 2.121047  |
| 50 | 1 | 0 | -2.959178 | 0.731875  | 3.367621  |
| 51 | 1 | 0 | -1.707498 | -1.072951 | 2.217729  |
| 52 | 1 | 0 | -1.265314 | -2.444796 | -2.320845 |

Supporting Information

---

|    |   |   |           |           |           |
|----|---|---|-----------|-----------|-----------|
| 53 | 1 | 0 | -2.786321 | -0.910294 | -3.635085 |
| 54 | 1 | 0 | -4.059581 | 0.854624  | -2.424174 |
| 55 | 1 | 0 | -6.096884 | 0.318249  | -1.238357 |
| 56 | 1 | 0 | -6.868051 | 1.869691  | -1.649719 |
| 57 | 1 | 0 | -6.997194 | 1.218601  | 0.009615  |
| 58 | 1 | 0 | -4.388082 | 3.911651  | 0.139837  |
| 59 | 1 | 0 | -5.962674 | 3.453508  | 0.850869  |
| 60 | 1 | 0 | -5.864719 | 3.955832  | -0.852307 |

---

1-Hg<sup>2+</sup>:

Standard orientation:

---

| Center<br>Number | Atomic<br>Number | Atomic<br>Type | Coordinates (Angstroms) |           |          |
|------------------|------------------|----------------|-------------------------|-----------|----------|
|                  |                  |                | X                       | Y         | Z        |
| 1                | 6                | 0              | -5.337218               | -2.160886 | 1.238411 |
| 2                | 6                | 0              | -4.145569               | -1.830096 | 0.596337 |
| 3                | 7                | 0              | -4.034026               | -0.617365 | 0.011617 |
| 4                | 6                | 0              | -4.904366               | 0.393897  | 0.227631 |
| 5                | 6                | 0              | -6.114901               | 0.115259  | 0.859530 |
| 6                | 6                | 0              | -6.350876               | -1.193197 | 1.307261 |

---

Supporting Information

---

|    |    |   |           |           |           |
|----|----|---|-----------|-----------|-----------|
| 7  | 6  | 0 | -2.814571 | -2.610179 | 0.719848  |
| 8  | 6  | 0 | -4.317025 | 1.807906  | -0.002132 |
| 9  | 7  | 0 | -1.817402 | -1.572755 | 1.196546  |
| 10 | 6  | 0 | -0.329472 | -1.722241 | 1.209839  |
| 11 | 6  | 0 | 0.324784  | -0.321396 | 1.504297  |
| 12 | 7  | 0 | -0.141373 | 0.792258  | 0.587665  |
| 13 | 6  | 0 | -0.541458 | 2.140828  | 1.156330  |
| 14 | 6  | 0 | -1.846570 | 2.745141  | 0.524445  |
| 15 | 7  | 0 | -2.949746 | 1.740979  | 0.650696  |
| 16 | 6  | 0 | 3.512942  | 0.456981  | -0.105925 |
| 17 | 6  | 0 | 4.668354  | -0.422474 | -0.098457 |
| 18 | 6  | 0 | 5.857968  | -0.033429 | 0.643279  |
| 19 | 6  | 0 | 5.755049  | 1.087563  | 1.479404  |
| 20 | 6  | 0 | 4.620341  | 1.902233  | 1.471694  |
| 21 | 6  | 0 | 3.521497  | 1.630974  | 0.669522  |
| 22 | 6  | 0 | 2.412523  | 0.003269  | -0.890106 |
| 23 | 6  | 0 | 2.371828  | -1.187747 | -1.593696 |
| 24 | 6  | 0 | 3.467352  | -2.051616 | -1.489613 |
| 25 | 6  | 0 | 4.575865  | -1.673254 | -0.741533 |
| 26 | 16 | 0 | 0.906336  | 1.022244  | -0.987826 |
| 27 | 8  | 0 | -0.148645 | 0.243803  | -2.013879 |

Supporting Information

---

|    |   |   |           |           |           |
|----|---|---|-----------|-----------|-----------|
| 28 | 8 | 0 | 1.025519  | 2.597312  | -1.159877 |
| 29 | 7 | 0 | 7.019386  | -0.766203 | 0.550802  |
| 30 | 6 | 0 | 7.588822  | -1.193478 | -0.760540 |
| 31 | 6 | 0 | 8.039650  | -0.660700 | 1.619243  |
| 32 | 1 | 0 | -5.462226 | -3.127898 | 1.708356  |
| 33 | 1 | 0 | -6.838567 | 0.900243  | 1.037540  |
| 34 | 1 | 0 | -7.290321 | -1.433735 | 1.789596  |
| 35 | 1 | 0 | -2.938281 | -3.447277 | 1.414586  |
| 36 | 1 | 0 | -2.478585 | -3.002338 | -0.247066 |
| 37 | 1 | 0 | -4.975806 | 2.559995  | 0.443647  |
| 38 | 1 | 0 | -4.190773 | 2.036646  | -1.066480 |
| 39 | 1 | 0 | -2.138438 | -1.197976 | 2.097106  |
| 40 | 1 | 0 | 0.032051  | -2.414886 | 1.981330  |
| 41 | 1 | 0 | -0.001924 | -2.099286 | 0.235774  |
| 42 | 1 | 0 | 0.074302  | -0.014567 | 2.524795  |
| 43 | 1 | 0 | 1.413183  | -0.430698 | 1.446326  |
| 44 | 1 | 0 | 0.259129  | 2.868889  | 0.989282  |
| 45 | 1 | 0 | -0.675404 | 2.002681  | 2.233311  |
| 46 | 1 | 0 | -2.055391 | 3.686869  | 1.048154  |
| 47 | 1 | 0 | -1.672114 | 2.972225  | -0.531465 |
| 48 | 1 | 0 | -3.076727 | 1.496547  | 1.640381  |

Supporting Information

---

|    |    |   |           |           |           |
|----|----|---|-----------|-----------|-----------|
| 49 | 1  | 0 | 6.603120  | 1.387316  | 2.077906  |
| 50 | 1  | 0 | 4.628942  | 2.806196  | 2.069572  |
| 51 | 1  | 0 | 2.721884  | 2.353362  | 0.580342  |
| 52 | 1  | 0 | 1.516891  | -1.430846 | -2.210085 |
| 53 | 1  | 0 | 3.445581  | -3.008446 | -1.994189 |
| 54 | 1  | 0 | 5.393738  | -2.371049 | -0.630102 |
| 55 | 1  | 0 | 6.903767  | -0.944012 | -1.570862 |
| 56 | 1  | 0 | 7.796438  | -2.268187 | -0.764647 |
| 57 | 1  | 0 | 8.529921  | -0.655716 | -0.929169 |
| 58 | 1  | 0 | 7.555043  | -0.632149 | 2.597403  |
| 59 | 1  | 0 | 8.675305  | 0.226726  | 1.494808  |
| 60 | 1  | 0 | 8.672684  | -1.550773 | 1.572920  |
| 61 | 80 | 0 | -1.982142 | -0.034140 | -0.726194 |

---
